# Supplementary material for: Evaluation of Preferred Language and Timing of COVID-19 Vaccine Uptake and Disease Outcomes
Source: PubMed Central journal article supplement (PMC10099068; doi:10.1001/jamanetworkopen.2023.7877), 2023-04-12
Supplement: jamanetwopen-e237877-s002.pdf [file jamanetwopen-e237877-s002.pdf]

## Data Sharing Statement

Quadri. Evaluation of Preferred Language and Timing of COVID-19 Vaccine Uptake and Disease Outcomes. *JAMA Netw Open*. Published April 12, 2023.

doi:10.1001/jamanetworkopen.2023.7877

### Data

**Data available:** No

### Additional Information

**Explanation for why data not available:** The database constitutes almost the entire HealthPartners patient data and would include patients with unique identifiable information. We would be willing to share aggregate and de-identified data upon request.
